# Supplementary material for: Dissecting the Roles of Cuticular Wax in Plant Resistance to Shoot Dehydration and Low-Temperature Stress in Arabidopsis
Source: PubMed Central journal article supplement (PMC7913816; doi:10.3390/ijms22041554), 2021-02-04
Supplement: ijms-22-01554-s001.pdf [file ijms-22-01554-s001.pdf]

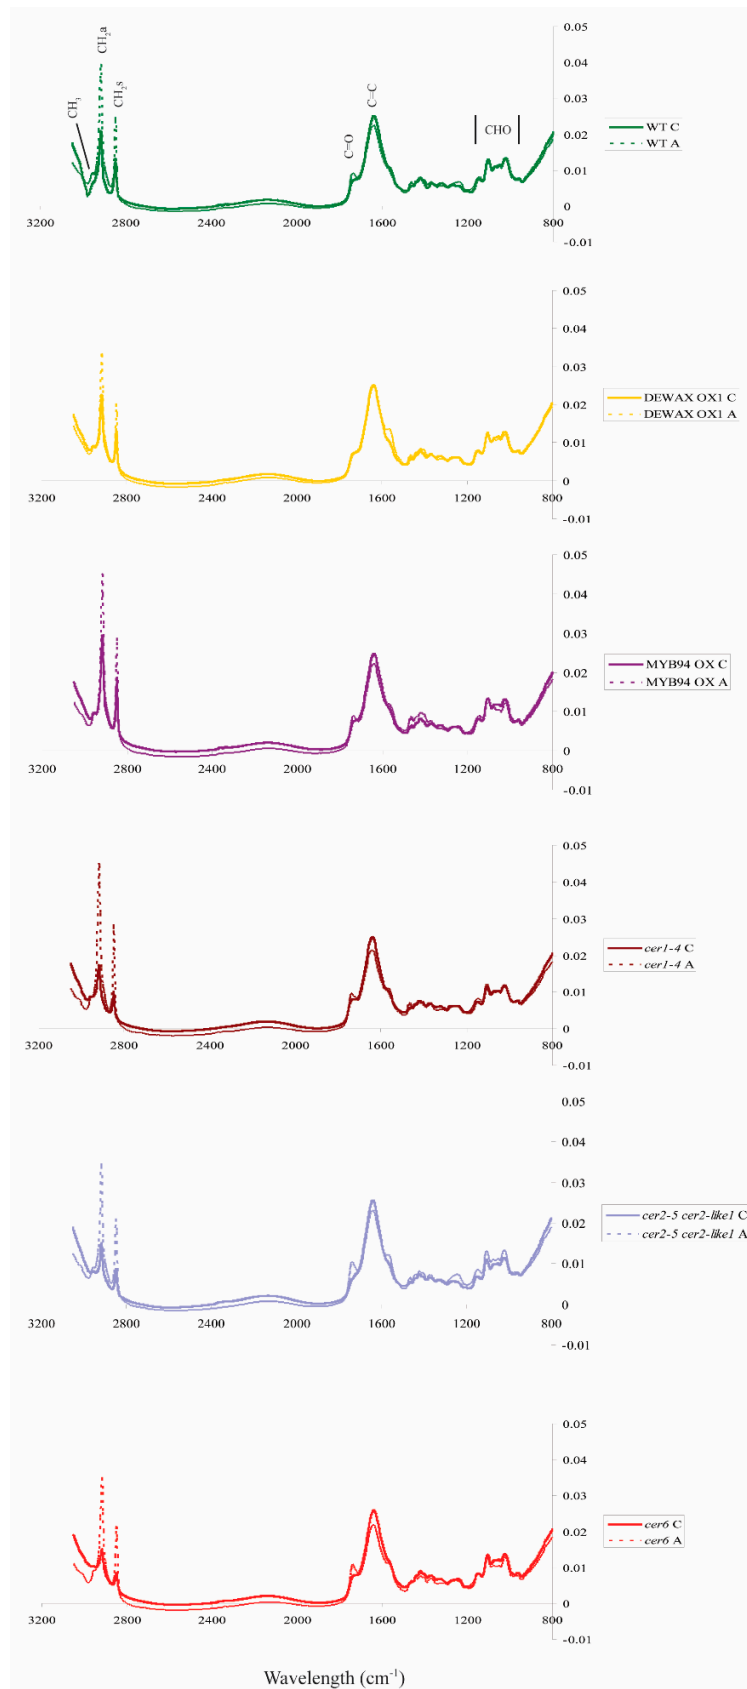

**Figure S1.** ATR-FTIR spectral profiles of rosette leaf adaxial surfaces under control (C; solid lines) and cold-acclimated (A; dotted lines) conditions for WT, DEWAX OX1, MYB94 OX, *cer1-4*, *cer2-5 cer2-like1*, *cer6* presented.

**Table S1.** Pearson correlation values between GC-MS and ATR-FTIR data.

|        | <b>CH<sub>3</sub></b> | <b>CH<sub>2a</sub></b> | <b>CH<sub>2s</sub></b> | <b>CO</b> | <b>CC</b> | <b>RCH<sub>32s</sub></b> | <b>RCO<sub>2s</sub></b> | <b>RCC<sub>2s</sub></b> |
|--------|-----------------------|------------------------|------------------------|-----------|-----------|--------------------------|-------------------------|-------------------------|
| C24.FA | 0.88                  | 0.63                   | 0.47                   | 0.80      | -0.86     | 0.21                     | 0.21                    | -0.44                   |
| C26.FA | 0.91                  | 0.82                   | 0.69                   | 0.59      | -0.96     | -0.04                    | -0.06                   | -0.66                   |
| C28.FA | 0.64                  | 0.98                   | 0.99                   | -0.11     | -0.85     | -0.69                    | -0.73                   | -0.98                   |
| C30.FA | -0.08                 | 0.57                   | 0.71                   | -0.56     | -0.27     | -0.96                    | -0.85                   | -0.75                   |
| C32.FA | -0.74                 | -0.23                  | -0.04                  | -0.69     | 0.50      | -0.60                    | -0.44                   | -0.03                   |
| C34.FA | -0.85                 | -0.51                  | -0.33                  | -0.63     | 0.72      | -0.31                    | -0.20                   | 0.28                    |
| C29.H  | -0.31                 | 0.38                   | 0.53                   | -0.64     | -0.04     | -0.90                    | -0.76                   | -0.55                   |
| C31.H  | -0.63                 | -0.02                  | 0.15                   | -0.67     | 0.32      | -0.72                    | -0.54                   | -0.19                   |
| C33.H  | -0.66                 | -0.05                  | 0.12                   | -0.68     | 0.35      | -0.71                    | -0.53                   | -0.17                   |
| C35.H  | -0.46                 | 0.16                   | 0.33                   | -0.61     | 0.13      | -0.81                    | -0.63                   | -0.39                   |
| C26.OH | -0.95                 | -0.57                  | -0.40                  | -0.76     | 0.83      | -0.32                    | -0.22                   | 0.38                    |
| C28.OH | -0.92                 | -0.51                  | -0.33                  | -0.84     | 0.80      | -0.40                    | -0.33                   | 0.30                    |
| C29.OH | 0.65                  | 0.98                   | 0.99                   | -0.10     | -0.85     | -0.68                    | -0.73                   | -0.98                   |
| C30.OH | -0.09                 | 0.55                   | 0.68                   | -0.61     | -0.24     | -0.95                    | -0.86                   | -0.72                   |
| C32.OH | -0.15                 | 0.47                   | 0.62                   | -0.55     | -0.19     | -0.91                    | -0.78                   | -0.67                   |
| C34.OH | -0.41                 | 0.23                   | 0.40                   | -0.58     | 0.06      | -0.83                    | -0.65                   | -0.45                   |

**Table S2.** ATR-FTIR spectroscopic data (partial) of cauline leaf adaxial cuticle surfaces generated under cold acclimation from WT, *cer1-4* and *cer3-6*.

|                        | <b>CH<sub>3</sub> stretching (2966-2950) (CH<sub>3</sub>)</b> | <b>CH<sub>2</sub> asymmetric (2936-2894) (CH<sub>2a</sub>)</b> | <b>CH<sub>2</sub> symmetric (2871-2826) (CH<sub>2s</sub>)</b> |
|------------------------|---------------------------------------------------------------|----------------------------------------------------------------|---------------------------------------------------------------|
| <b>WT A</b>            | 0.16 ± 0.011                                                  | 1.23 ± 0.05                                                    | 0.51 ± 0.02                                                   |
| <b><i>cer1-4</i> A</b> | 0.14 ± 0.002                                                  | 1.36 ± 0.04                                                    | 0.57 ± 0.02                                                   |
| <b><i>cer3-6</i> A</b> | 0.122 ± 0.01* ( <i>p</i> = 0.02; WT A vs. <i>cer3-6A</i> )    | 0.56 ± 0.08** ( <i>p</i> = 0.003; WT A vs. <i>cer3-6A</i> )    | 0.186 ± 0.04** ( <i>p</i> = 0.0008; WT A vs. <i>cer3-6A</i> ) |
